# Supplementary material for: Understanding the role of AgNO 3 concentration and seed morphology in the achievement of tunable shape control in gold nanostars
Source: Royal Society of Chemistry journal article supplement (doi:10.1039/c8nr07615d), 2019-01-01
Supplement: c8nr07615d1.pdf [file c8nr07615d1.pdf]

## Supporting Information

### Understanding the Role of AgNO<sub>3</sub> Concentration and Seed Morphology to Achieve Tunable Shape Control in Gold Nanostars

Supriya Atta,<sup>a</sup> Michael Beetz,<sup>b</sup> and Laura Fabris<sup>c\*</sup>

<sup>a</sup> Department of Chemistry and Chemical Biology, Rutgers University, Piscataway NJ, 08854 USA

<sup>b</sup> Department of Chemistry and Center for NanoScience (CeNS), Ludwig Maximilian Universität München, 81377 Munich, Germany.

<sup>c</sup> Department of Materials Science and Engineering, Rutgers University, Piscataway NJ, 08854 USA

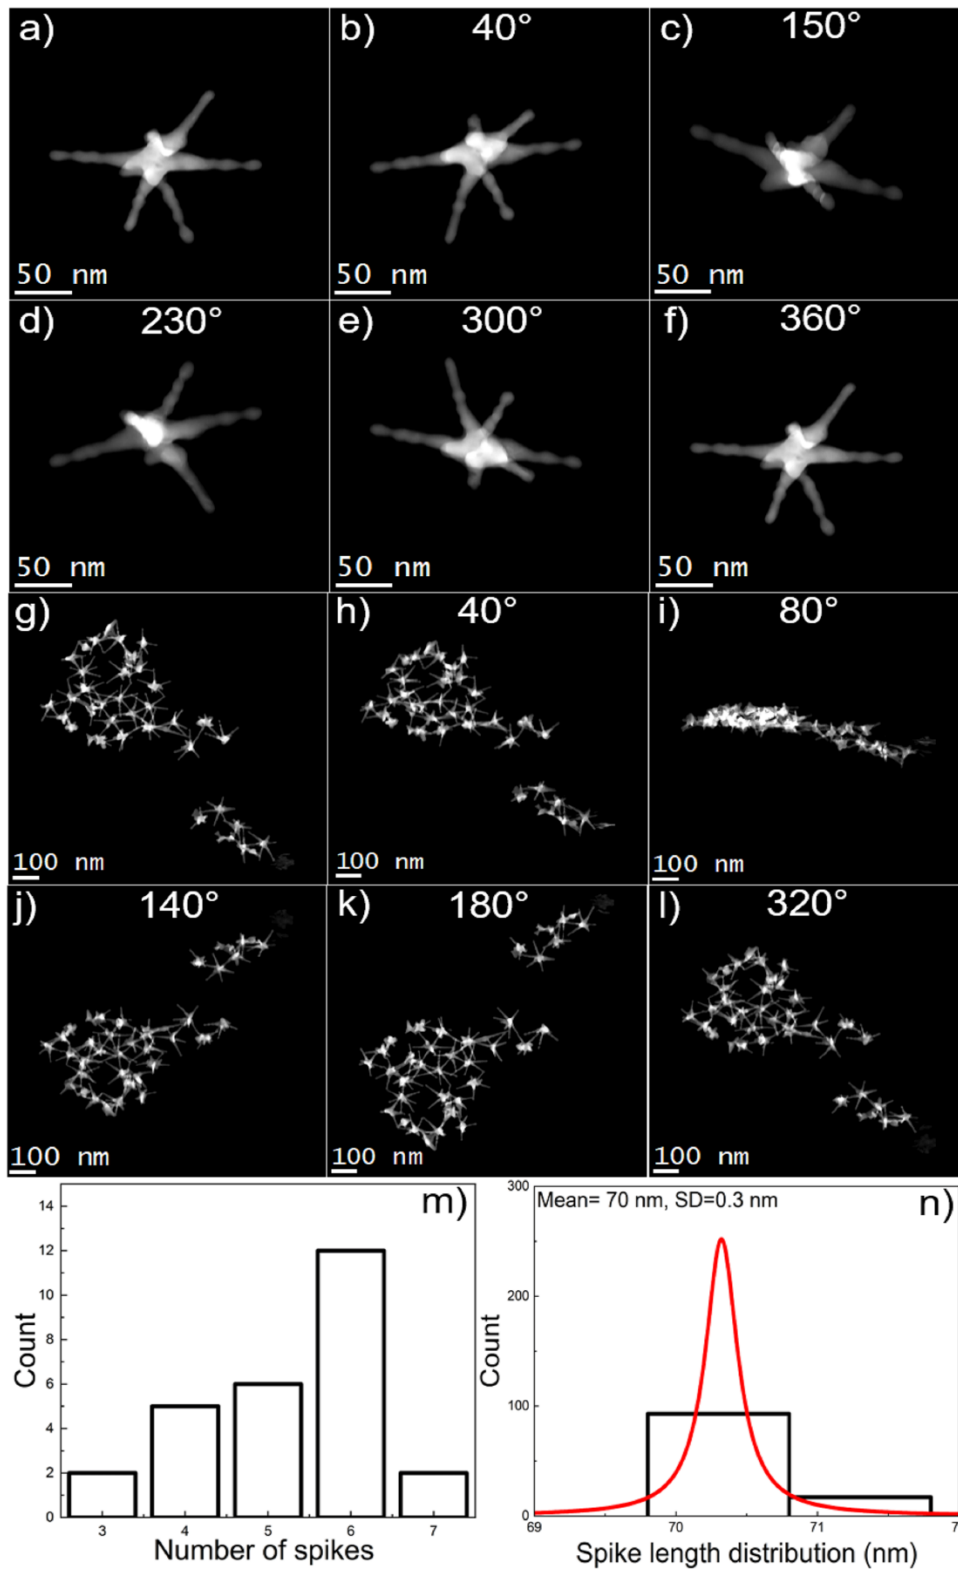

**Figure S1.** (a-f) Tomogram of a 6-branched gold nanostar at different tilt angles exhibiting a maximum of six spikes after examination at all orientations. (g-l) Tilt angle series of a set of nanostars. m) Statistical analysis of this sample reveals that around 44 % of these stars are 6-

branched stars. n) Statistical analysis of the spike length for a sample designed to possess 70 nm spikes (0.15 M Triton X, 1.6 mM ascorbic acid, 30  $\mu\text{M}$   $\text{AgNO}_3$ , and 0.14 nM seeds). The measured standard deviation is ten times smaller than what measured using traditional 2D TEM statistical analysis (vide infra).

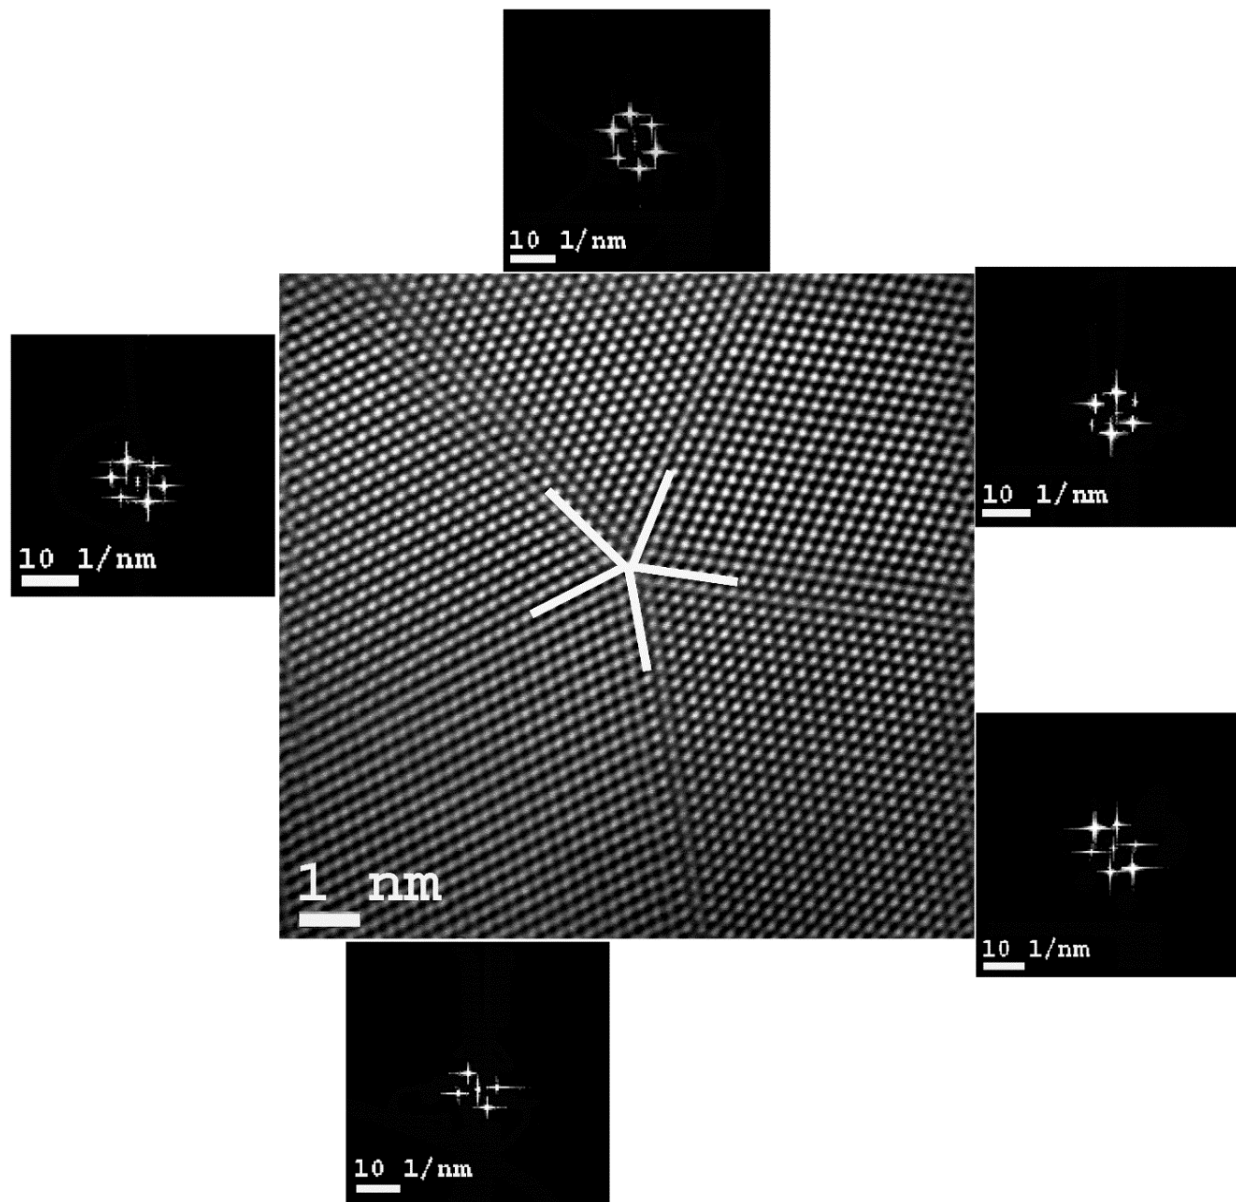

**Figure S2.** FFT images for the various planes observed in the STEM micrograph of the five-fold defect reported in Figure 2d exhibiting five different  $\{111\}$  facets.

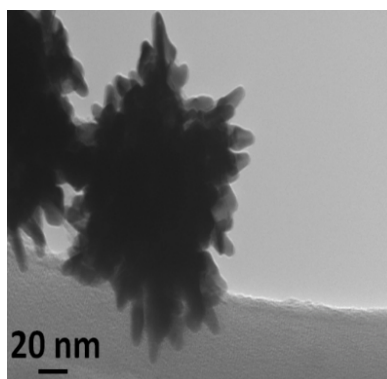

**Figure S3.** TEM micrograph of gold nanostars obtained in the absence of Triton X, where the concentration of the other variables was 1.6 mM (ascorbic acid), 100  $\mu\text{M}$  ( $\text{AgNO}_3$ ), and 0.14 nM seeds.

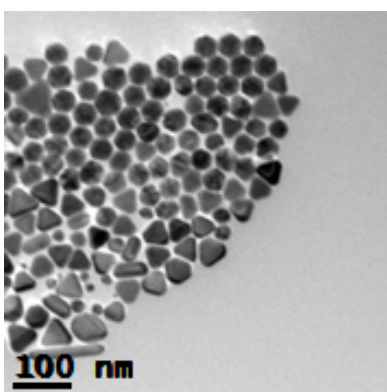

**Figure S4.** TEM micrograph of polyhedral gold nanoparticles formed in the absence of  $\text{AgNO}_3$ . The concentrations of the other variables, Triton-X, ascorbic acid, and seeds, were 0.15 M, 1.6 mM, and 0.14 nM respectively.

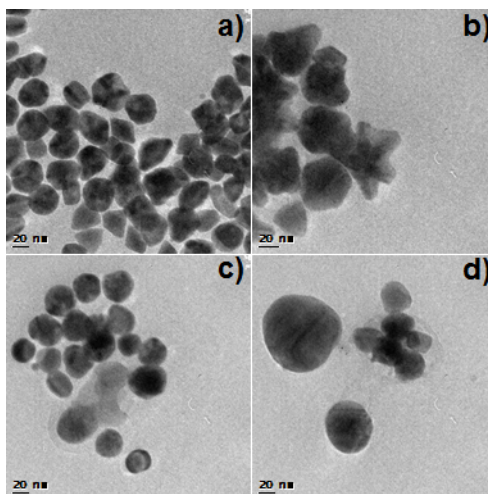

**Figure S5.** TEM micrographs of gold nanoparticles formed under different concentrations of  $\text{AgNO}_3$  (25  $\mu\text{M}$  (a), 50  $\mu\text{M}$  (b), 100  $\mu\text{M}$  (c), and 150 (d)). The concentrations of the other variables Triton-X, ascorbic acid, and seeds were kept constant, at 0.15 M, 0.8 mM, and 0.14 nM respectively.

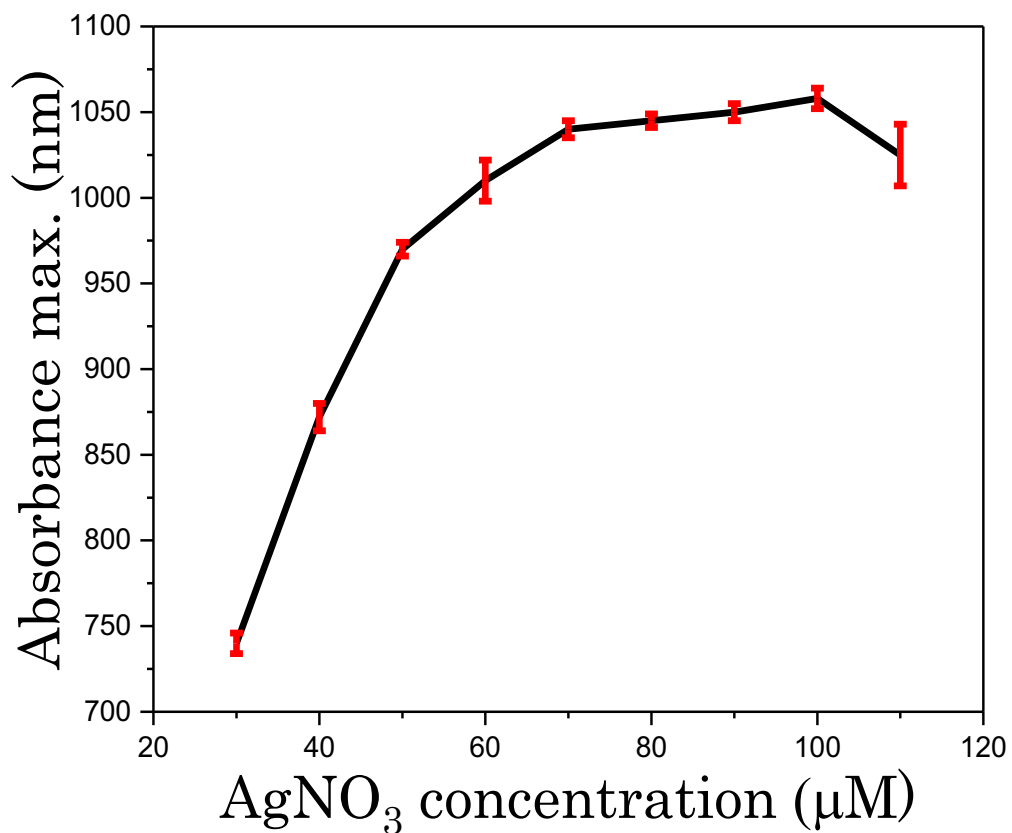

**Figure S6.** Evolution of the LSPR position with AgNO<sub>3</sub> concentration (30 μM, 40 μM, 50 μM, 60 μM, 70 μM, 80 μM, 90 μM, 100 μM, and 110 μM) at constant concentration of Triton X (0.15 M), ascorbic acid (1.6 mM), and seeds (0.14 nM).

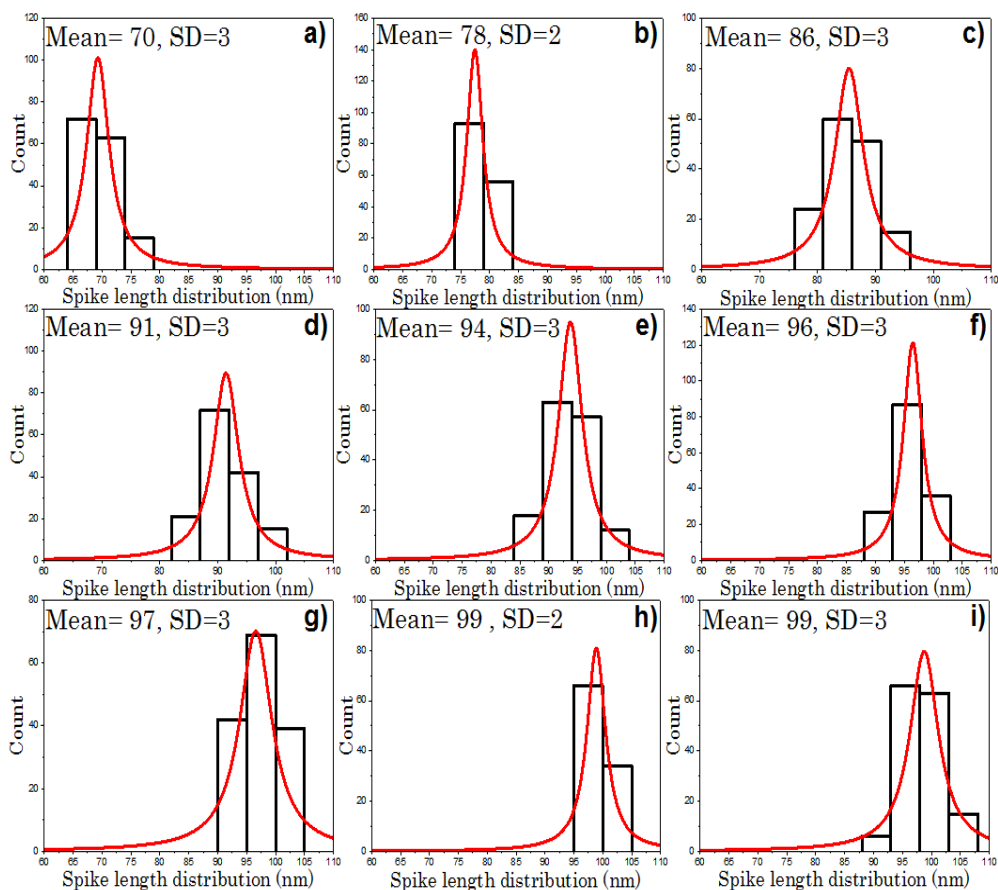

**Figure S7.** Statistical analysis of the spike length (the distance measured from the core to the tip) of 6-branched nanostars when the concentration of  $\text{AgNO}_3$  was varied from  $30 \mu\text{M}$  to  $110 \mu\text{M}$  ( $30 \mu\text{M}$  (a),  $40 \mu\text{M}$  (b),  $50 \mu\text{M}$  (c),  $60 \mu\text{M}$  (d),  $70 \mu\text{M}$  (e),  $80 \mu\text{M}$  (f),  $90 \mu\text{M}$  (g),  $100 \mu\text{M}$  (h), and  $110 \mu\text{M}$  (i)) while the concentrations of Triton X ( $0.15 \text{ M}$ ), ascorbic acid ( $1.6 \text{ mM}$ ), and seeds ( $0.14 \text{ nM}$ ) were kept constant.

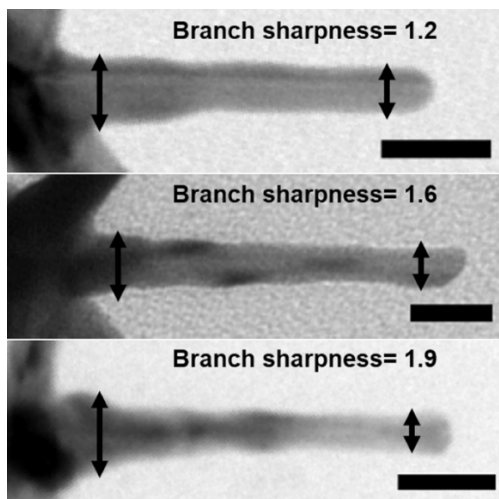

**Figure S8.** Detailed TEM micrographs of spikes having aspect ratios (the ratio of width at core and tip of a spike) of 1.2 ( $40 \mu\text{M}$   $\text{AgNO}_3$ ), 1.6 ( $60 \mu\text{M}$   $\text{AgNO}_3$ ), and 1.9 ( $100 \mu\text{M}$   $\text{AgNO}_3$ ). The concentration of Triton X ( $0.15 \text{ M}$ ), ascorbic acid ( $1.6 \text{ mM}$ ), and seeds ( $0.14 \text{ nM}$ ) were kept constant. Scale bars are  $20 \text{ nm}$ .



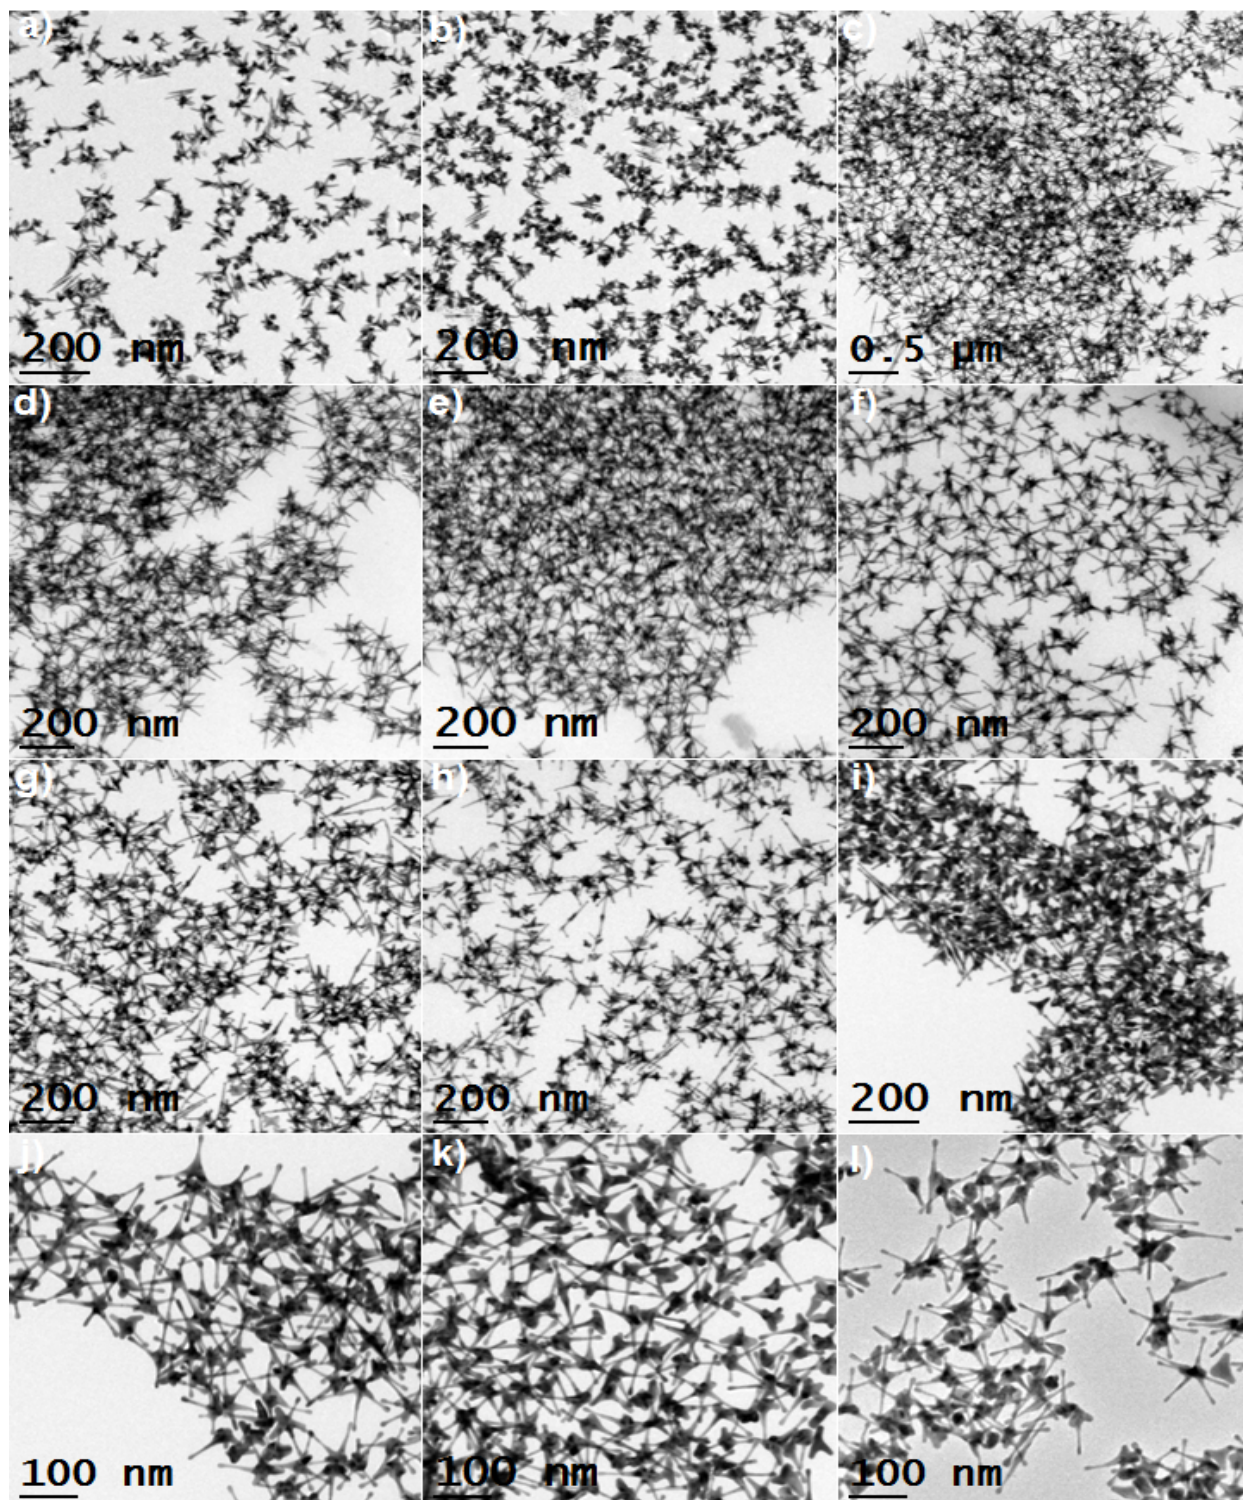

**Figure S9.** (a-l) TEM micrographs with many stars at different time interval- 30 sec (a), 1 min (b), 1 min 30 sec (c), 2 min (d), 5 min (e), 10 min (f), 30 min (g), 60 min (h), 120 min (i), 240 min (j), 480 min (k), and 720 min (l) when the concentrations of Triton X, ascorbic acid,  $\text{AgNO}_3$ , and seeds were kept at 0.15 M, 1.6 mM, 30  $\mu\text{M}$ , and 0.14 nM respectively. These micrographs portray the consistently high monodispersity of these nanostar batches.



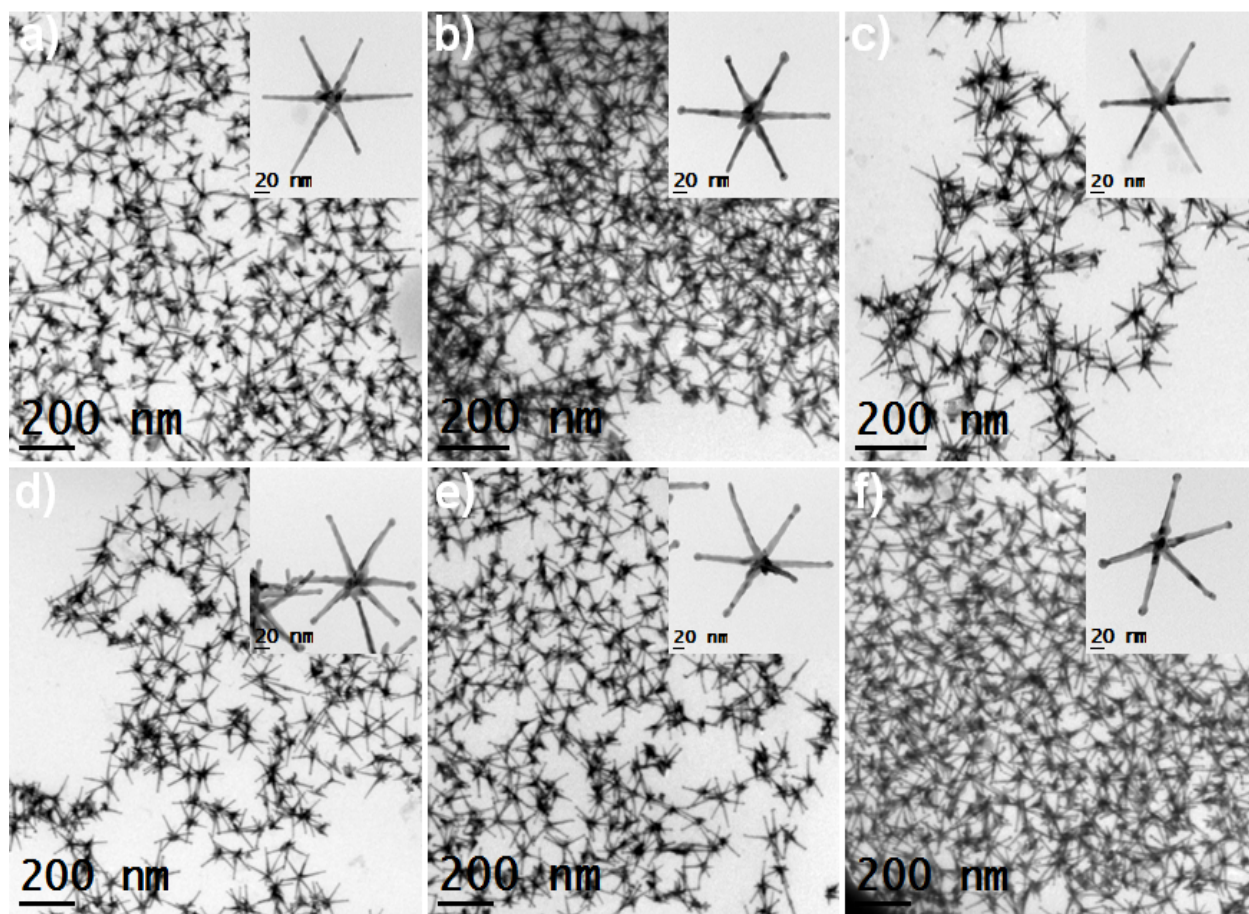

**Figure S10.** (a-f) TEM micrographs of 6-branched gold nanostars formed after 5 min reaction time under different  $\text{AgNO}_3$  concentration-30  $\mu\text{M}$  (a), 40  $\mu\text{M}$  (b), 50  $\mu\text{M}$  (c), 60  $\mu\text{M}$  (d), 80  $\mu\text{M}$  (e), and 100  $\mu\text{M}$  (f) while the concentrations of Triton X (0.15 M), ascorbic acid (1.6 mM), and seeds (0.14 nM) were kept constant.

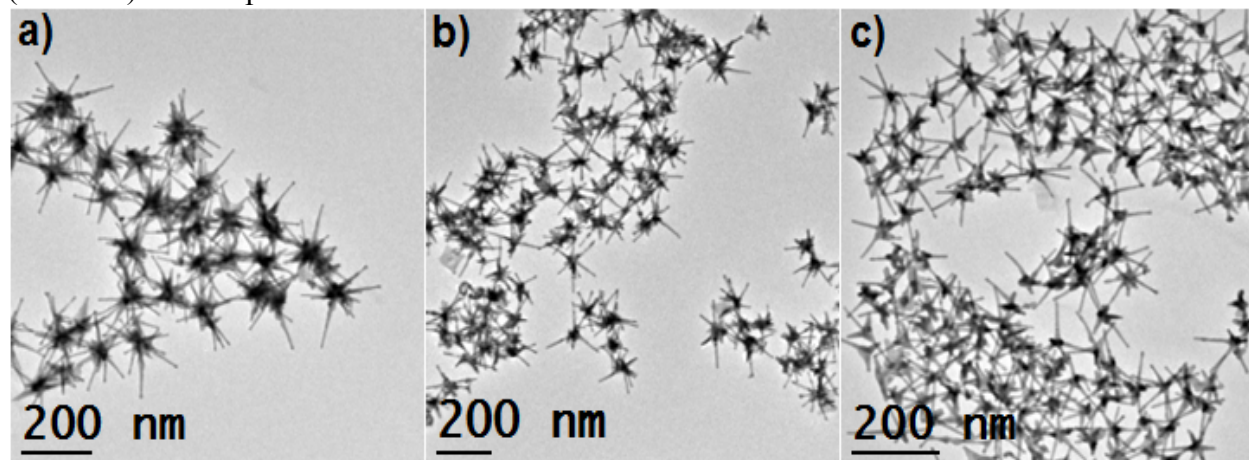

**Figure S11.** (a-c) TEM micrographs of gold nanostars obtained starting from different amounts of seeds (0.02 nM (a), 0.06 nM (b), and 0.1 nM (c)) added to the growth solution containing 1.5 M Triton X, 1.6 mM ascorbic acid, and 100  $\mu\text{M}$  of  $\text{AgNO}_3$ .



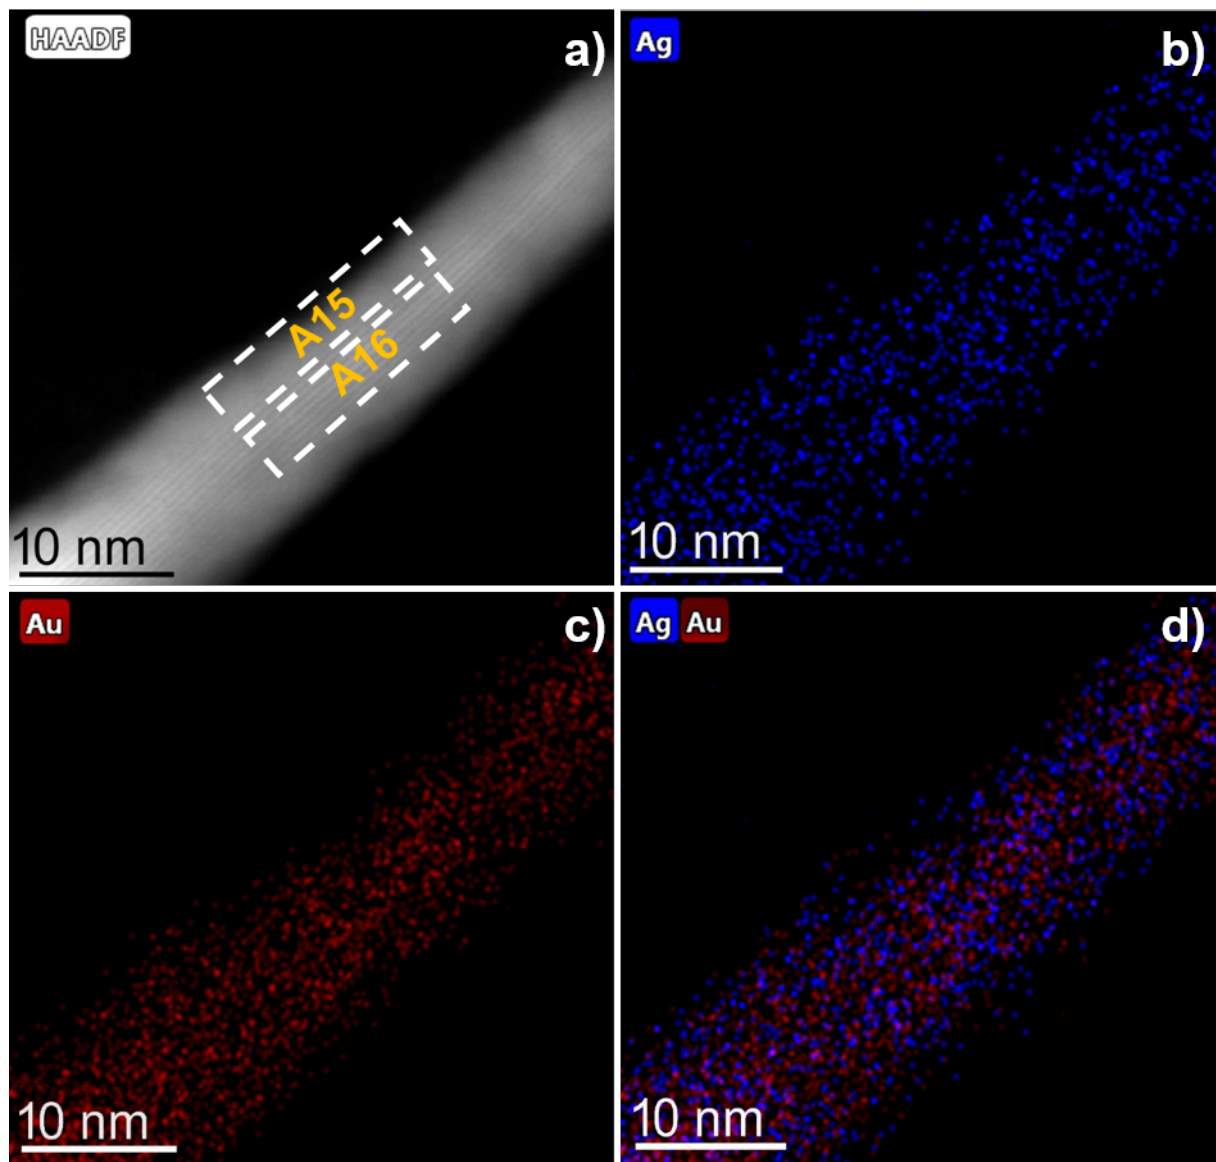

**Figure S12.** HAADF-STEM image and elemental maps of the spike (a-d) for 110  $\mu\text{M}$   $\text{AgNO}_3$  concentration after 12 hours.

| Area | Element | Atomic Fraction (%) | Atomic Error (%) |
|------|---------|---------------------|------------------|
| A1   | Ag      | 3.28                | 0.56             |
|      | Au      | 96.72               | 17.90            |
| A2   | Ag      | 8.84                | 1.47             |
|      | Au      | 91.16               | 16.44            |
| A3   | Ag      | 4.12                | 0.72             |
|      | Au      | 95.88               | 17.68            |
| A4   | Ag      | 2.46                | 0.40             |
|      | Au      | 97.54               | 18.12            |
| A5   | Ag      | 5.66                | 1.05             |
|      | Au      | 94.34               | 17.31            |
| A6   | Ag      | 4.94                | 0.99             |
|      | Au      | 95.06               | 17.55            |
| A7   | Ag      | 36.87               | 4.79             |
|      | Au      | 63.13               | 10.07            |
| A8   | Ag      | 23.61               | 3.39             |
|      | Au      | 76.39               | 12.82            |
| A9   | Ag      | 12.17               | 2.05             |
|      | Au      | 87.83               | 15.65            |
| A10  | Ag      | 8.34                | 1.29             |
|      | Au      | 91.66               | 16.52            |
| A11  | Ag      | 13.04               | 1.95             |
|      | Au      | 86.96               | 15.30            |
| A12  | Ag      | 17.62               | 2.55             |
|      | Au      | 82.38               | 14.15            |
| A13  | Ag      | 25.05               | 4.30             |
|      | Au      | 74.95               | 13.28            |
| A14  | Ag      | 18.70               | 3.51             |
|      | Au      | 81.30               | 14.62            |
| A15  | Ag      | 33.70               | 10.02            |
|      | Au      | 66.30               | 16.89            |
| A16  | Ag      | 13.78               | 2.56             |
|      | Au      | 86.22               | 15.56            |

**Table S1.** Area scan elemental profile of 6-branched stars at 30  $\mu$ M, 100  $\mu$ M, and 110  $\mu$ M AgNO<sub>3</sub>.
